# Supplementary material for: Epsilon toxin–producing Clostridium perfringens colonize the multiple sclerosis gut microbiome overcoming CNS immune privilege
Source: PubMed Central journal article supplement (PMC10145940; doi:10.1172/jci163239), 2023-05-01
Supplement: jci-133-163239-s176.pdf [file jci-133-163239-s176.pdf]

## Supplemental Table 2

**Multivariable logistic regression using binary *etx* status as outcome confirms MS is independently associated with *etx* status, adjusting for sex and treatment.**

|           | <i>Characteristic</i> | <i>OR<sup>1</sup></i> | <i>95% CI<sup>2</sup></i> | <i>p-value</i> |
|-----------|-----------------------|-----------------------|---------------------------|----------------|
| Group     | HC                    | —                     | —                         |                |
|           | MS                    | 25.2                  | 4.46, 218                 | <0.001         |
| Gender    | Female                | —                     | —                         |                |
|           | Male                  | 0.68                  | 0.14, 2.88                | 0.6            |
| Treatment | No treatment          | —                     | —                         |                |
|           | Treatment             | 0.29                  | 0.04, 1.52                | 0.2            |

1 OR = Odds Ratio, 2 CI = Confidence Interval
